# Supplementary material
Source: publisher site journal article supplement (https://www.e-cmh.org/upload/media/cmh-2023-0449-Supplementary-Fig-8.pdf)
Supplement: Supplementary file 1 [file cmh-2023-0449-Supplementary-Fig-8.pdf]

| groups                            | # of samples | Steatosis vs MASH | AUC   | P-value  |
|-----------------------------------|--------------|-------------------|-------|----------|
| Obese ( $\geq 25\text{kg/m}^2$ )  | 118          | 53 vs 65          | 0.968 | 1.31E-18 |
| non-obese ( $< 25\text{kg/m}^2$ ) | 15           | 7 vs 8            | 1.000 | 6.34E-04 |
| PNPLA3 mut                        | 91           | 43 vs 48          | 0.951 | 1.14E-17 |
| PNPLA3 wt                         | 28           | 13 vs 15          | 1.000 | 1.16E-06 |
| Diabetic                          | 36           | 11 vs 25          | 0.898 | 2.51E-05 |
| non-diabetic                      | 97           | 49 vs 48          | 0.976 | 2.76E-22 |

**Supplementary Fig. 8.** Application of the 6 signature gene set to MASLD progression in different subtype. ROC result describing 6 signature gene set accuracy in different subgroups (obese or non-obese, PNPLA3 mut or wildtype, diabetic or non-diabetic).
